# Supplementary material
Source: Royal Society of Chemistry journal article supplement (https://www.rsc.org/suppdata/cp/1999/5623/esi_service.doc)
Supplement: Supplementary file 1 [file esi_service.doc]

## Electronic Supplementary Information

## Appendix

In this Appendix we show how the fluorescence lifetime of the forbidden S1 state of Lb nature (F1) can [see eq.(9) of the text] or cannot depend on temperature in the presence of a second emission component from an allowed S2 state of La-Bu nature, which is thermally equilibrated with S1.

On the basis of the proposed kinetic scheme for the deactivation pathways of the lowest excited singlet states of the *trans*-2-StAn B rotamer [see eqs.(1)-(7) of the text], the experimental value results to be the sum of two contributions due to the radiative processes, which originate from S1 and S2:

= (kF1[S1] + kF2[S2])/Ia (A1)

By using the stationary-state approximation, eqn.(A1) assumes the form:

=kF1+[kF2F2Aexp(E(S2-S1)/RT)]/[kF1+kISC+k01+(1k12F2)Aexp(E(S2-S1)/RT)]

= kF1 +[kF2F2 A exp(E(S2-S1)/RT)]F1(T) (A2)

Therefore, the fluorescence lifetime of S1 results to be a function of temperature. However, the dependence of F1 on temperature can be (case a) or cannot be (case B) experimentally observed.

***case a*** : a dependence of F1 on temperature can be observed, as shown by eq.(A3):

F1(T) = 1/[kF1 + kISC + k01 +(1  k12F2) A exp(E(S2-S1)/RT)] (A3),

if the energy gap between S1 and S2 is such as to make the term [(1 k12F2)Aexp(E(S2-S1)/RT)] not negligible relatively to (kF1 + kISC + k01). This fact is essentially due to the decrease of the kF1 and k12 values and the S2 relative population with increasing E(S2-S1), which increases the weight of the term [(1 k12F2)Aexp(E(S2-S1)/RT)] and decreases that of (kF1 + kISC + k01).

The fluorescence lifetime of S1 at temperatures where the S2S0 radiative process is no longer observable, F1lim, is given by:

F1lim = 1/(kF1 + kISC + k01) (A4)

By eqs.(A3) and (A4) we can derive the following equation:

ln [F1lim/F1(T)  1] = ln [(1  k12F2) F1lim A]  E(S2-S1)/RT (A5)

which allows to obtain the energy gap between S1 and S2.

Being the fluorescence intensity of the S2S0 radiative process, observed at one em, IF2(em), proportional to its fluorescence quantum yield, we obtain the equation (A6):

IF2(em,T) F2(T) =[kF2F2Aexp(E(S2-S1)/RT)]/[kF1+kISC+k01+(1k12F2)Aexp(E(S2-S1)/RT)]

 [kF2F2Aexp(E(S2-S1)/RT)] F1(T) (A6)

which shows a non-linear dependence of ln[IF2(em,T)] on 1/T. Reduction to eq.(10) is obtained by multiplying both the terms of eq.(A6) for F1lim  :

[IF2(em,T) F1lim/F1(T)] = I'F2(em) exp(E(S2-S1)/RT (A7)

where I'F2(em) exp(E(S2-S1)/RT is the fluorescence intensity due to the thermal population of S2 and contains the Boltzmann factor which gives the fraction of molecules in the S2 state populated during the lifetime of S1.

Eq.(A7) in the more suitable form:

ln [IF2(em,T) F1lim/F1(T)] = lnI'F2(em)  E(S2-S1)/RT (A8)

allows to obtain the energy gap between the two lowest excited singlet states.

***case b***: independence of F1 of temperature.

In the presence of a very small energy gap between S1 and S2 (as found in more polar solvents) kF1 markedly increases by vibronic coupling between the two excited states; similarly k12 also increases. The radiative and S2S1 internal conversion rate constants can assume a value such to make the term [(1k12F2)Aexp(E(S2-S1)/RT)] practically negligible relatively to (kF1+kISC+k01). In this case, eq.(A3) practically reduces to:

F1 = 1/(kF1 + kISC + k01) (A9)

and the dependence of F1 on temperature is not observable as well as ln IF2(em,T) shows a linear trend with 1/T.

**Table 1’** Ratio of the fluorescence intensities of *trans*-2-StAn(B) in MCH/3MP, measured at em 406 and 390 nm, and in BuCN, measured at em 416 and 395 nm, as a function of exc at three different temperatures.

¾¾¾¾¾¾¾¾¾¾¾¾¾¾¾¾¾¾¾¾¾¾¾¾¾¾¾¾¾¾¾¾

MCH/3MP BuCN

IF1(exc,406)/IF2(exc,390) IF1(exc,416)/IF2(exc,395)

exc(nm)  

340 K 293 K 250 K 340 K 293 K 250 K

¾¾¾¾¾¾¾¾¾¾¾¾¾¾¾¾¾¾¾¾¾¾¾¾¾¾¾¾¾¾¾¾ 278 2.82 3.19 5.84 7.94 12.1 21.3 330 3.19 3.42 6.76 9.15 11.8 21.7

336 2.48 3.17 6.42 8.12 10.6 19.6

342 2.57 3.16 6.80 7.66 11.5 18.3

348 2.47 3.15 5.94 7.50 10.7 20.0

352 2.48 3.18 6.58 7.69 11.4 19.7

358 2.56 3.17 6.72 8.00 10.7 20.9

368 2.50 3.23 6.16 8.57 11.3 22.4

378 3.03 3.27 6.52 9.08 12.4 22.9

384 2.82 3.37 6.36 8.55 12.3 20.5

¾¾¾¾¾¾¾¾¾¾¾¾¾¾¾¾¾¾¾¾¾¾¾¾¾¾¾¾¾¾¾¾

**Fig. 1’** Fluorescence decay of *trans*-2-StAn in MeCN at room temperature (exc = 380 nm, em = 444 nm). Full line shows the fit of the bi-exponential deconvolution procedure. The distribution of the residuals is also reported.

**Fig. 2’** Fluorescence lifetime of *trans*-2-StAn in MCH/3MP as a function of temperature. The inset shows the plot of eq. (9).

**Fig. 3’** Plot of ln[IF2 (em)  F,t-Blim/F,t-B(T)] against 1/T for *trans*-2-StAn in: (a) MCH/3MP and (b) BuCN. The full line is a computer least squares fit to eqs. (10) and (11) in (a) and (b), respectively.

**Fig. 4’** Plot of ln[IF2 (em) / IF1 (’em)] against 1/T for *trans*-2-StAn(B) in: (a) MCH/3MP and (b) BuCN. The full line is a computer least squares fit to eq. (12).

**Fig. 5’** Plot of IF2(em)/IF1(’em) against [S2]/[S1] for *trans*-2-StAn(B) in MCH/3MP and BuCN.

**Fig. 6’** Plot of the Arrhenius equation [eq. (14)] for the activated torsional process of *trans*-2-StAn(B) in MCH/3MP.

**Fig. 7’** Fluorescence lifetime of *cis*-2-StAn(A) as a function of temperature in MCH/3MP. The inset shows the plot of eq.(19).

**Fig. 8’** Temperature effect on the photocyclization quantum yield (cBT) of *cis*-2-StAn in MCH/3MP. The inset shows the plot of eq. (20).
